# Supplementary material for: The L motifs of two moss pentatricopeptide repeat proteins are involved in RNA editing but predominantly not in RNA recognition
Source: PubMed Central journal article supplement (PMC7190159; doi:10.1371/journal.pone.0232366), 2020-04-29

Fig 1B

| <i>nad3</i> |   |   |    |    |    |    |     | <i>nad4</i> |   |    |    |    |    |     |  | unrelated protein and probe |  |
|-------------|---|---|----|----|----|----|-----|-------------|---|----|----|----|----|-----|--|-----------------------------|--|
| 56ΔDYW-wt   |   |   |    |    |    |    |     | 56ΔDYW-wt   |   |    |    |    |    |     |  |                             |  |
| (nM)        | 0 | 1 | 10 | 25 | 50 | 75 | 100 | 0           | 1 | 10 | 25 | 50 | 75 | 100 |  |                             |  |

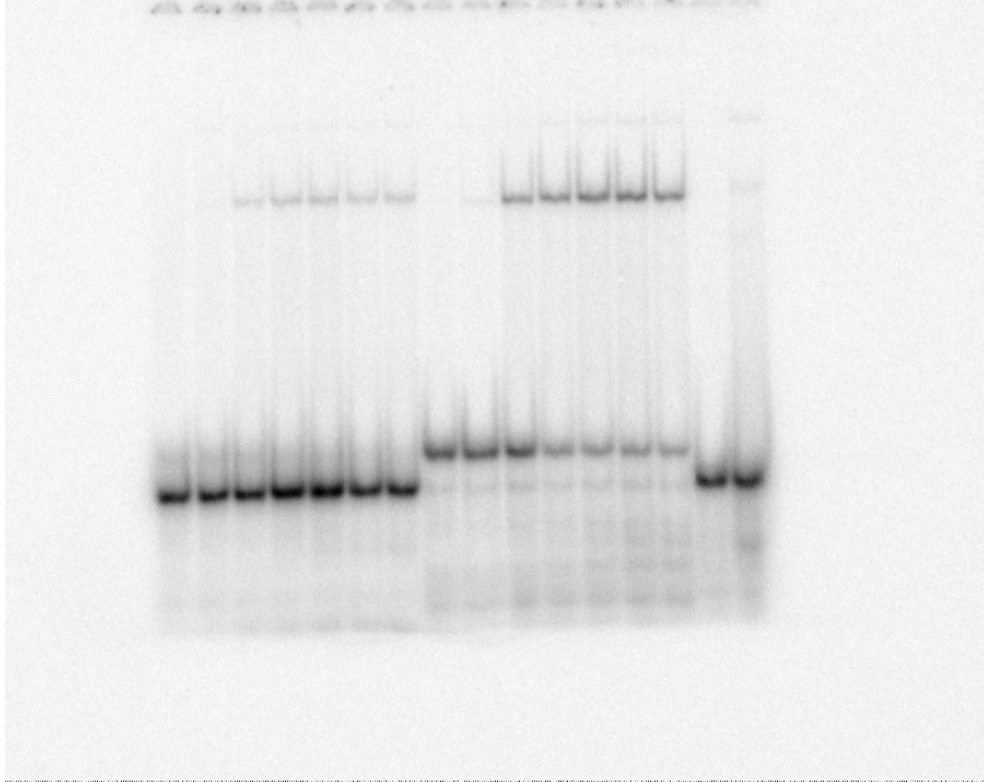

Fig 2B

| <i>nad3</i>  |   |    |    |    |    |     |     | <i>nad4</i>  |   |    |    |    |    |     |     |      |
|--------------|---|----|----|----|----|-----|-----|--------------|---|----|----|----|----|-----|-----|------|
| 56ΔDYW-nad3L |   |    |    |    |    |     |     | 56ΔDYW-nad3L |   |    |    |    |    |     |     | -wt  |
| -wt          |   |    |    |    |    |     |     | -wt          |   |    |    |    |    |     |     |      |
| 0            | 1 | 10 | 25 | 50 | 75 | 100 | 100 | 0            | 1 | 10 | 25 | 50 | 75 | 100 | 100 | (nM) |

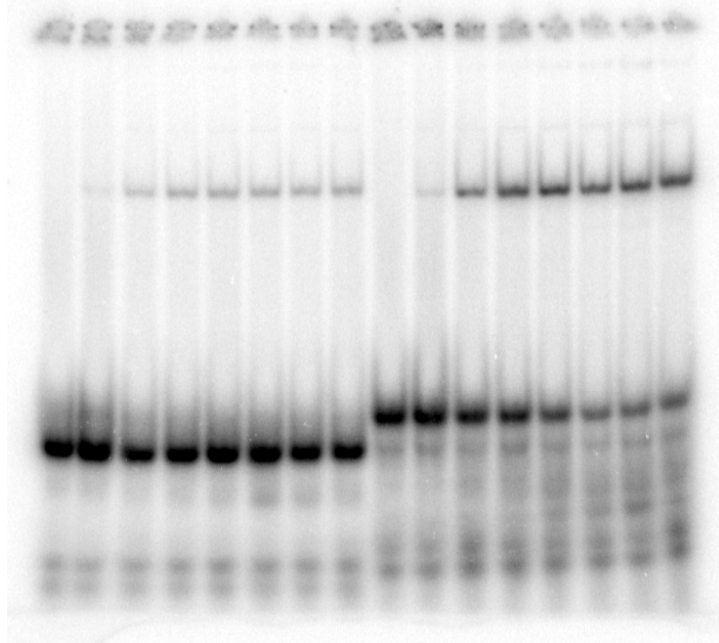

S1 Fig B

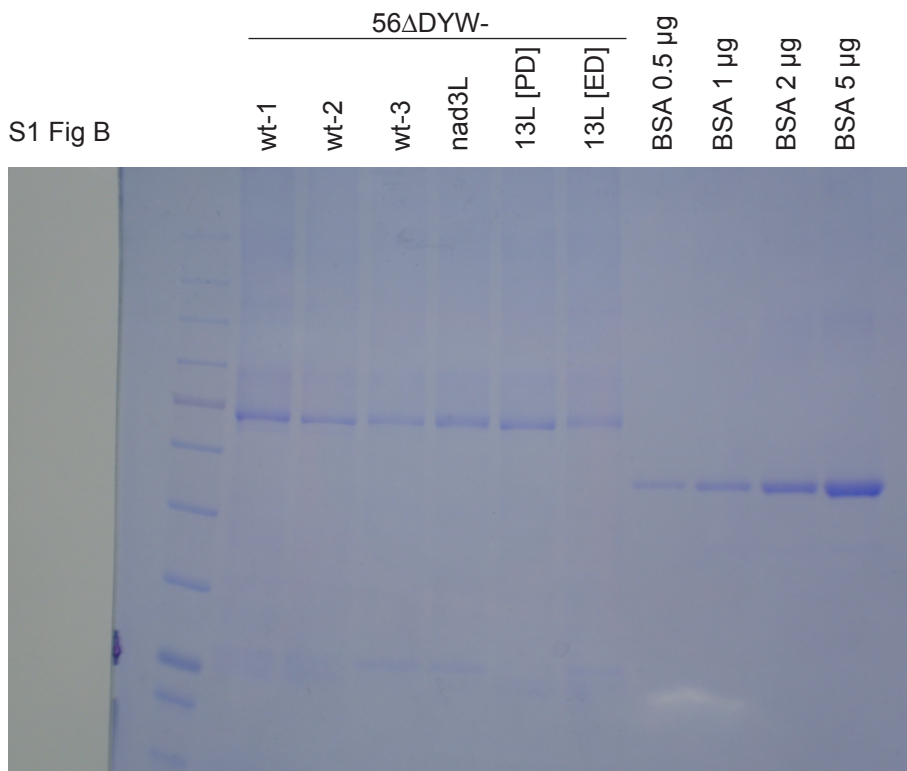

S3 Fig A

S1 Fig C

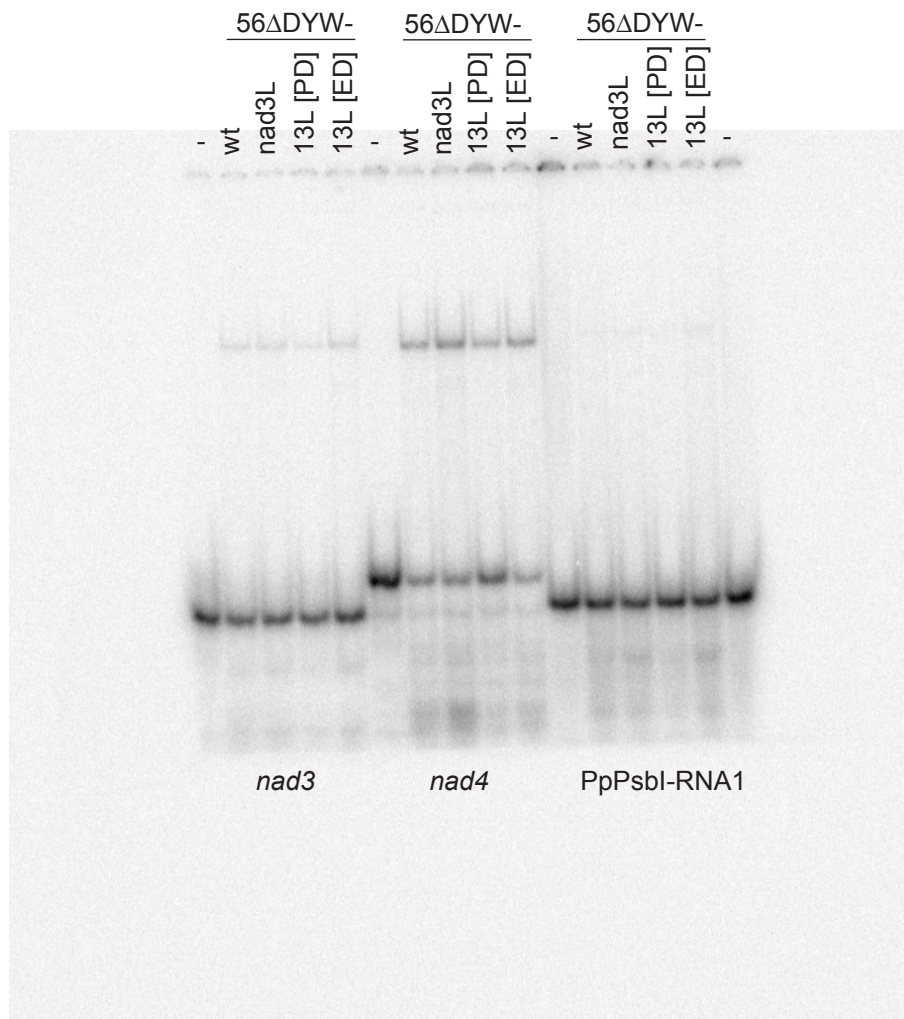

Fig 3B

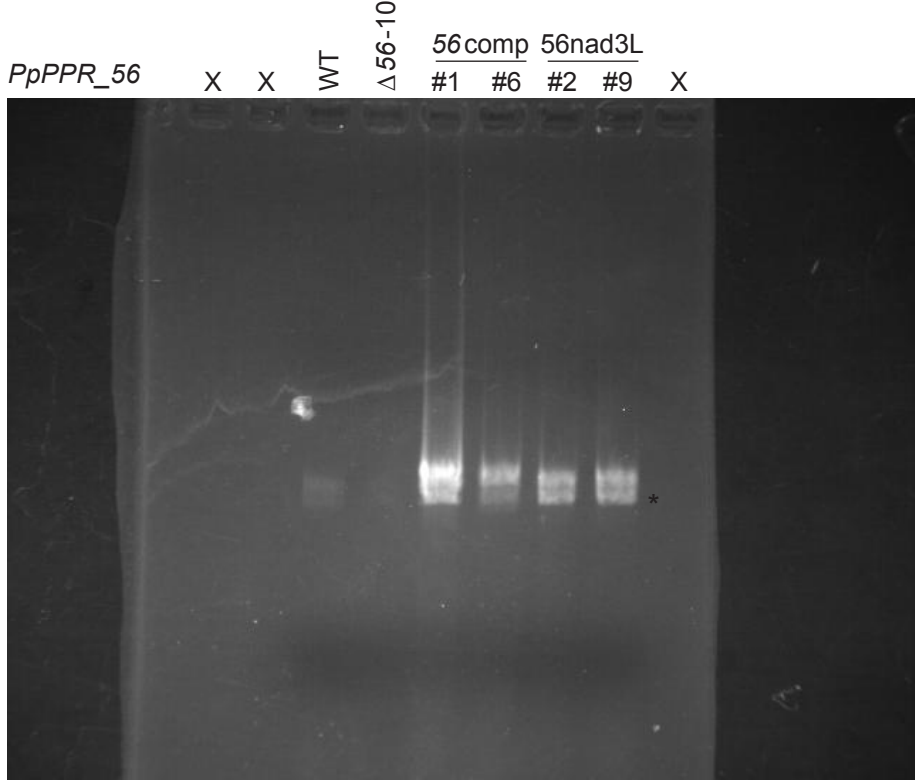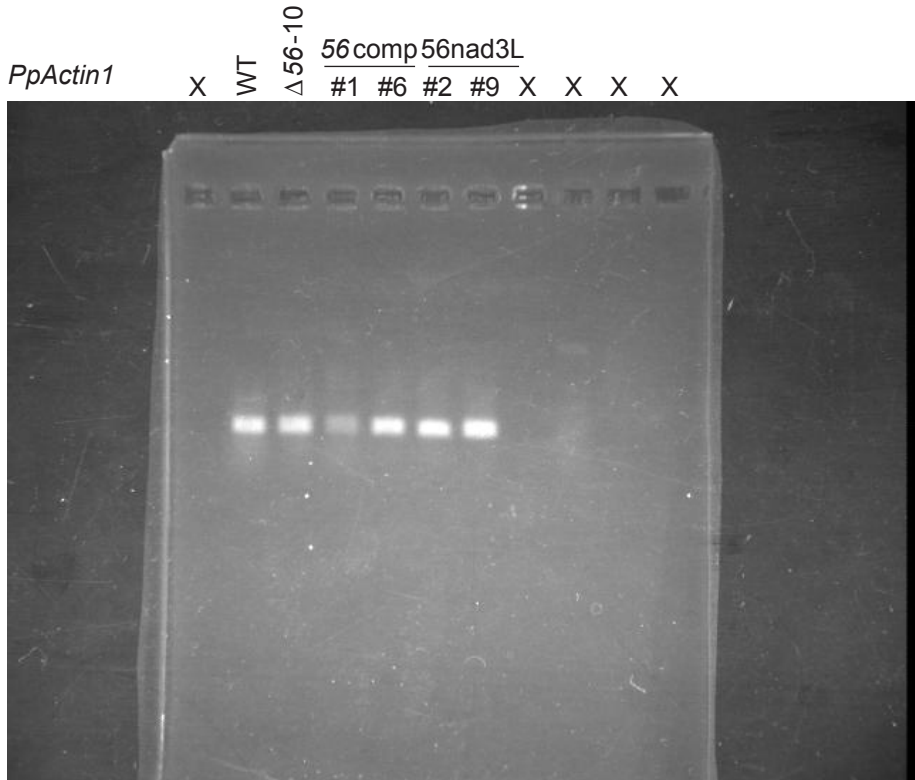

Fig 6C

*PpPPR\_78*      Marker      WT       $\Delta 78-19$       78comp      78-16L19L  
#1   #3   #1   #2   #3

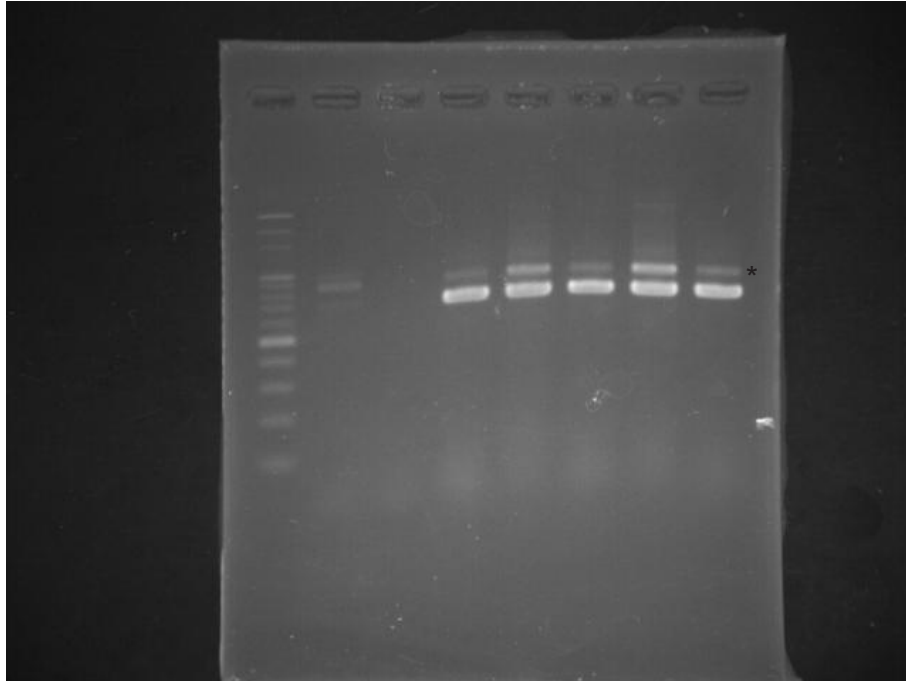

*PpActin1*      X      WT       $\Delta 78-19$       78comp      78-16L19L  
#1   #3   #1   #2   #3

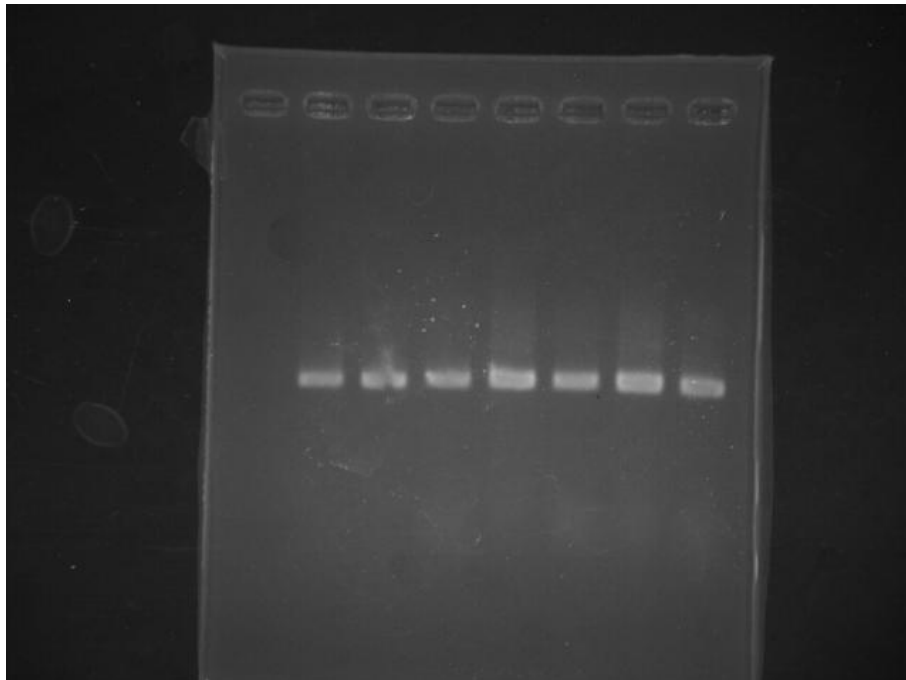

Supplement: pone.0232366.s004.pdf [file pone.0232366.s004.pdf]
